# Supplementary material for: Ultrasmall magnolol/ebselen nanomicelles for preventing renal ischemia/reperfusion injury
Source: Royal Society of Chemistry journal article supplement (doi:10.1039/d4bm00614c), 2024-01-01
Supplement: d4bm00614c1.pdf [file d4bm00614c1.pdf]

## Supplementary Material

### Ultrasmall Magnolol/Ebselen Nanomicelles for Preventing Renal Ischemia/Reperfusion Injury

Chang Liu<sup>1#</sup>, Linhua Li<sup>1#</sup>, Li Li<sup>2</sup>, Qingyin Li<sup>3</sup>, Jing Liu<sup>1</sup>, Chunle Zhang<sup>1</sup>, Zhengjiang  
Cao<sup>1</sup>, Liang Ma<sup>1</sup>, Xiaoxi Zeng<sup>1\*</sup>, Ping Fu<sup>1\*</sup>

<sup>1</sup> Department of Nephrology, Institute of Kidney Diseases, West China Hospital of  
Sichuan University, Chengdu 610041, China.

<sup>2</sup> Institute of Clinical Pathology, West China Hospital of Sichuan University,  
Chengdu, 610041, China.

<sup>3</sup> Department of Nephrology, Institute of Kidney Diseases, Frontiers Science Center  
for Disease-related Molecular Network, West China Hospital, Sichuan University,  
Chengdu 610041, Sichuan, China

\* Corresponding author

# These authors contributed equally to this work.

E-mail: [zengxiaoxi@wchscu.cn](mailto:zengxiaoxi@wchscu.cn); [fupinghx@scu.edu.cn](mailto:fupinghx@scu.edu.cn)

**Fig. S1** The standard curve for nitrite was obtained by measuring the absorbance of sodium nitrite at different concentrations.

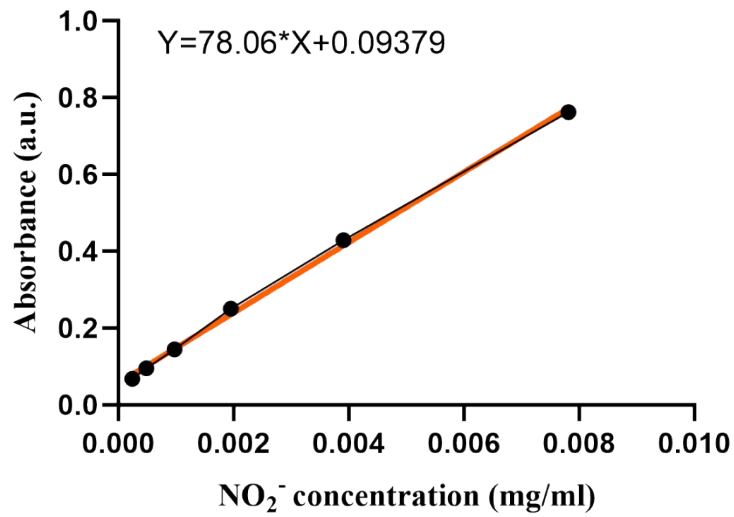

**Fig. S2** The appearance of MG/EBS-Ms at 120 d after preparation.

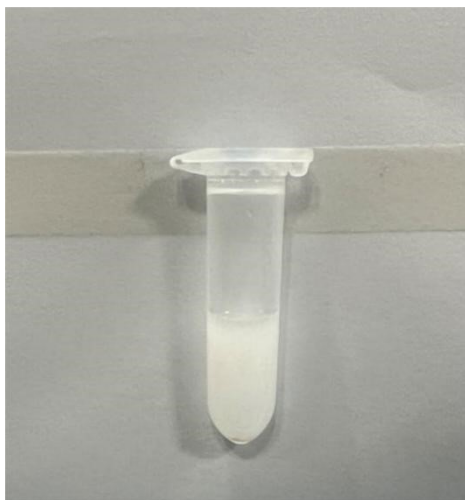

**Fig. S3** The standard curve of magnolol (MG) was gotten by the absorbance values corresponding to different concentrations of MG solution.

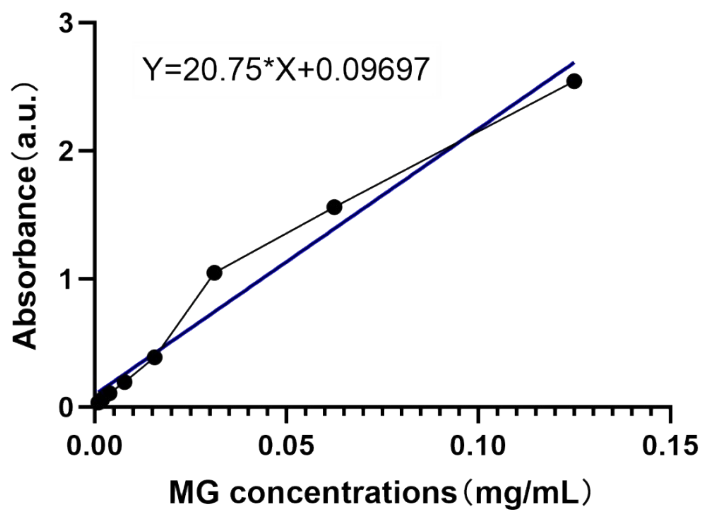

**Fig. S4** The standard curve of ebselen (EBS) was gotten by the absorbance values corresponding to different concentrations of EBS solution.

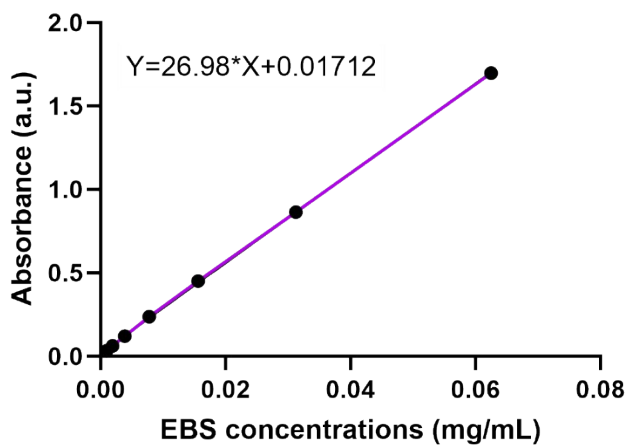

**Fig. S5** The rhodamine staining images of TCMK-1 cells after incubation with different samples for 24 hours with/without the presence of 200  $\mu$ M  $H_2O_2$ . Bar = 100  $\mu$ m.

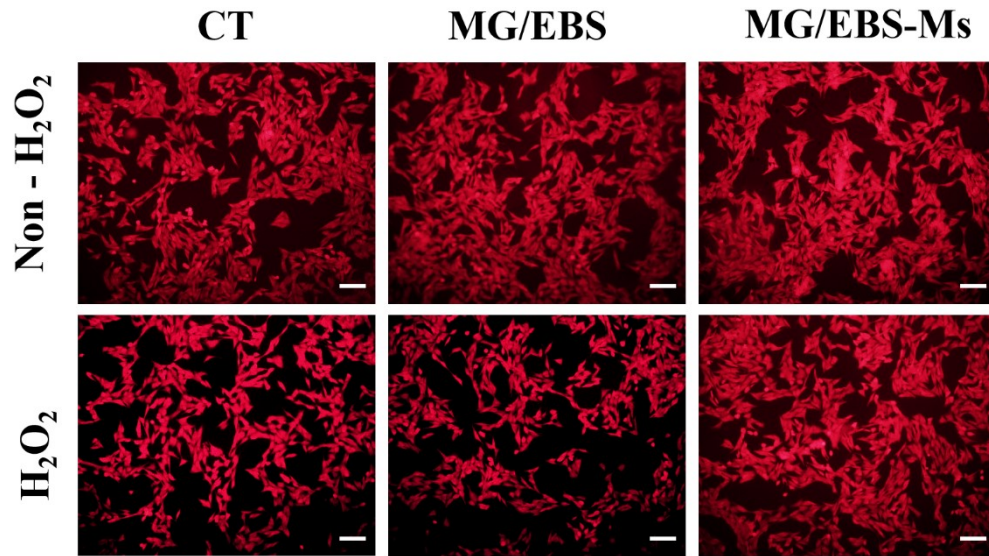

**Fig. S6** The hemolysis test results of 5µg/ml MG/EBS DMSO solution.

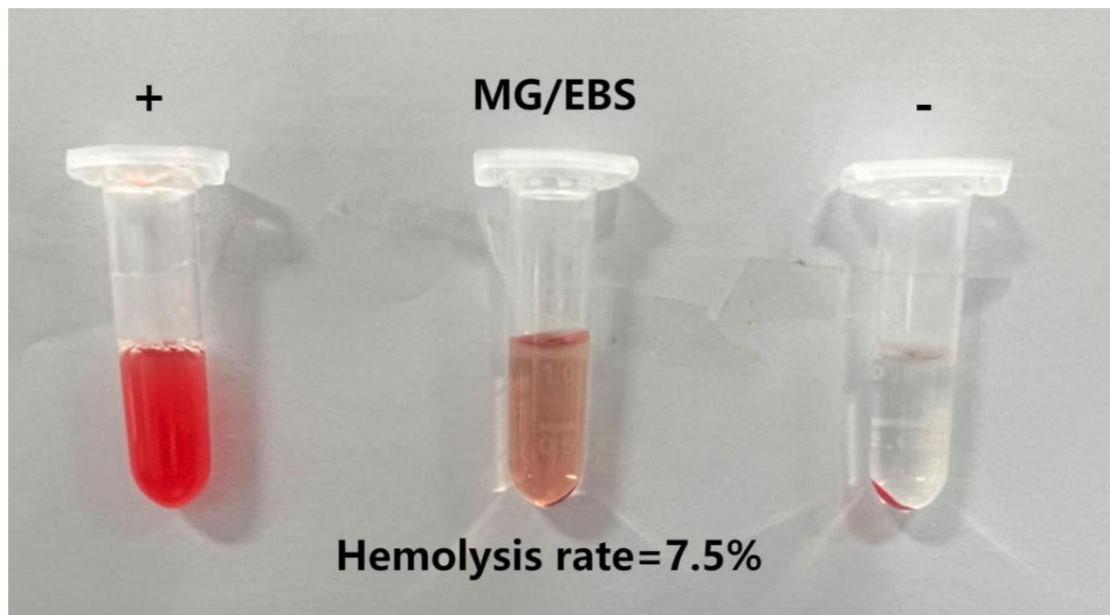

**Table S1.** Primer sequence used in this study.

| Species | Genes | Forward               | Reverse                 |
|---------|-------|-----------------------|-------------------------|
| Mouse   | MCP-1 | CATCCACGTGTTGGCTCA    | GATCATCTTGCTGGTGAATGAGT |
| Mouse   | IL-1β | ACTGTGAAATGCCACCTTTTG | TGTTGATGTGCTGCTGTGAG    |

|              |                                |                         |                          |
|--------------|--------------------------------|-------------------------|--------------------------|
| <b>Mouse</b> | <b>IL-6</b>                    | TAGTCCTTCCTACCCCAATTTCC | TAGTCCTTCCTACCCCAATTTCC  |
| <b>Mouse</b> | <b>TNF-<math>\alpha</math></b> | GCGACGTGGAAGTGGCAGAAG   | GCCACAAGCAGGAATGAGAAGAGG |
| <b>Mouse</b> | <b>Kim-1</b>                   | ACATATCGTGGAATCACAACGAC | ACTGCTCTTCTGATAGGTGACA   |
| <b>Mouse</b> | <b>NGAL</b>                    | TGGCCCTGAGTGTCATGTG     | CTCTTGTAGCTCATAGATGGTGC  |
| <b>Mouse</b> | <b>HMGB1</b>                   | GGCGAGCATCCTGGCTTATC    | GGCTGCTTGTCATCTGCTG      |
| <b>Mouse</b> | <b>Bcl-2</b>                   | GTCGCTACCGTCGTGACTTC    | CAGACATGCACCTACCCAGC     |
| <b>Mouse</b> | <b>Bax</b>                     | TGAAGACAGGGGCCTTTTTG    | AATTCGCCGGAGACACTCG      |
| <b>Mouse</b> | <b>GAPDH</b>                   | AGGTCGGTGTGAACGGATTTG   | GGGGTCGTTGATGGCAACA      |

---
